# Supplementary material for: Neighborhood Factors, Individual Stressors, and Cardiovascular Health Among Black and White Adults in the US: The Reasons for Geographic and Racial Differences in Stroke (REGARDS) Study
Source: PubMed Central journal article supplement (PMC10543067; doi:10.1001/jamanetworkopen.2023.36207), 2023-09-29
Supplement: jamanetwopen-e2336207-s001.pdf [file jamanetwopen-e2336207-s001.pdf]

## Supplemental Online Content

Hines AL, Albert MA, Blair JP, et al. Neighborhood factors, individual stressors, and cardiovascular health among Black and White adults in the US: the Reasons for Geographic and Racial Differences in Stroke (REGARDS) Study. *JAMA Netw Open*. 2023;6(9):e2336207. doi:10.1001/jamanetworkopen.2023.36207

**eTable 1.** Ideal Cardiovascular Health Domains as Implemented in REGARDS, Including Criteria and Scoring

**eTable 2.** Association Among Race, Individual and Community Stressors, and Ideal Cardiovascular Health Overall

**eTable 3.** Association Among Race, Individual and Community Stressors, and Ideal Cardiovascular Health for Men

**eTable 4.** Association Among Race, Individual and Community Stressors, and Ideal Cardiovascular Health for Women

This supplemental material has been provided by the authors to give readers additional information about their work.

**eTable 1. Ideal Cardiovascular Health Domains as Implemented in REGARDS, Including Criteria and Scoring**

| Ideal Cardiovascular Health Domains | Implemented in REGARDS                                                                                                                                                                                                                                                                                                                                                                      | Criteria                                                                                                                                         | Score       |
|-------------------------------------|---------------------------------------------------------------------------------------------------------------------------------------------------------------------------------------------------------------------------------------------------------------------------------------------------------------------------------------------------------------------------------------------|--------------------------------------------------------------------------------------------------------------------------------------------------|-------------|
| Diet                                | Number of criteria met from Block Food Frequency (98) <ul style="list-style-type: none"> <li>• <math>\geq 4.5</math> cups/day of fruits and vegetables</li> <li>• 200 g/wk of fish</li> <li>• <math>&gt;0.1</math> ratio of fiber to carbohydrates per day,</li> <li>• <math>\leq 450</math> calories/day of sweets/desserts and</li> <li>• <math>&lt;1500</math> mg/d of sodium</li> </ul> | 4 to 5<br>2 to 3<br>0 to 1                                                                                                                       | 2<br>1<br>0 |
| Physical activity                   | Times per week engage in intense physical activity, enough to work up a sweat                                                                                                                                                                                                                                                                                                               | $\geq 4$<br>1-3<br>0                                                                                                                             | 2<br>1<br>0 |
| Smoking                             | Current smoking status                                                                                                                                                                                                                                                                                                                                                                      | Never use or quit $> 12$ months ago<br>Former smoker quit $\leq 12$ months ago<br>Current smoker                                                 | 2<br>1<br>0 |
| BMI                                 | BMI (kg/m <sup>2</sup> )                                                                                                                                                                                                                                                                                                                                                                    | $<25.0$<br>25.0 – 29.9<br>$>30.0$                                                                                                                | 2<br>1<br>0 |
| Total cholesterol                   | Total cholesterol (mg/dL)                                                                                                                                                                                                                                                                                                                                                                   | $<200$<br>200-239 or treated to goal<br>$\geq 240$                                                                                               | 2<br>1<br>0 |
| Fasting glucose                     | Fasting glucose (mg/dL)                                                                                                                                                                                                                                                                                                                                                                     | Fasting $<100$ or non-fasting $<140$<br>Fasting 100-125, non-fasting 140-199, or treated to goal<br>Fasting $\geq 126$ or non-fasting $\geq 200$ | 2<br>1<br>0 |
| Blood pressure                      | Systolic and diastolic blood pressure (mmHg)                                                                                                                                                                                                                                                                                                                                                | $<120/<80$<br>SBP 120-139 or DBP 80-89, or treated to goal<br>$\geq 140/\geq 90$                                                                 | 2<br>1<br>0 |

**eTable 2. Association Among Race, Individual and Community Stressors, and Ideal Cardiovascular Health Overall**

|                                  | <i>Model 1<br/>Race only<br/>(unadjusted)</i> | <i>Model 2<br/>Model 1 +<br/>demographics</i> | <i>Model 3<br/>Model 2 +<br/>physical<br/>community<br/>environment</i> | <i>Model 4<br/>Model 3 +<br/>community<br/>safety</i> | <i>Model 5<br/>Model 4 +<br/>community<br/>social<br/>environment</i> | <i>Model 6<br/>Model 5 +<br/>perceived stress</i> | <i>Model 7<br/>Model 6 +<br/>perceived<br/>discrimination<br/>(Fully adjusted)</i> |
|----------------------------------|-----------------------------------------------|-----------------------------------------------|-------------------------------------------------------------------------|-------------------------------------------------------|-----------------------------------------------------------------------|---------------------------------------------------|------------------------------------------------------------------------------------|
|                                  | <b>OR<br/>95% CI</b>                          | <b>OR<br/>95% CI</b>                          | <b>OR<br/>95% CI</b>                                                    | <b>OR<br/>95% CI</b>                                  | <b>OR<br/>95% CI</b>                                                  | <b>OR<br/>95% CI</b>                              | <b>OR<br/>95% CI</b>                                                               |
| <b>Black versus White (ref.)</b> | <b>0.39 (0.35, 0.45)</b>                      | <b>0.49 (0.43, 0.55)</b>                      | <b>0.50 (0.44, 0.57)</b>                                                | <b>0.50 (0.44, 0.57)</b>                              | <b>0.50 (0.44, 0.57)</b>                                              | <b>0.50 (0.44, 0.57)</b>                          | <b>0.53 (0.45, 0.61)</b>                                                           |
| <i>Demographics</i>              |                                               |                                               |                                                                         |                                                       |                                                                       |                                                   |                                                                                    |
| Age (years)                      |                                               | 1.01 (1.00, 1.01)                             | 1.01 (1.00, 1.01)                                                       | 1.01 (1.00, 1.01)                                     | 1.00 (1.00, 1.01)                                                     | 1.00 (1.00, 1.01)                                 | 1.00 (1.00, 1.01)                                                                  |
| Gender                           |                                               |                                               |                                                                         |                                                       |                                                                       |                                                   |                                                                                    |
| Women                            |                                               | Ref.                                          | Ref.                                                                    | Ref.                                                  | Ref.                                                                  | Ref.                                              | Ref.                                                                               |
| Men                              |                                               | <b>0.88 (0.78, 0.98)</b>                      | <b>0.88 (0.78, 0.98)</b>                                                | <b>0.88 (0.78, 0.98)</b>                              | <b>0.88 (0.79, 0.99)</b>                                              | <b>0.87 (0.78, 0.97)</b>                          | <b>0.87 (0.78, 0.98)</b>                                                           |
| Education                        |                                               |                                               |                                                                         |                                                       |                                                                       |                                                   |                                                                                    |
| Less than high school            |                                               | Ref.                                          | Ref.                                                                    | Ref.                                                  | Ref.                                                                  | Ref.                                              | Ref.                                                                               |
| High school graduate             |                                               | <b>1.37 (1.07, 1.76)</b>                      | <b>1.35 (1.05, 1.73)</b>                                                | <b>1.35 (1.05, 1.73)</b>                              | <b>1.35 (1.05, 1.73)</b>                                              | <b>1.33 (1.03, 1.70)</b>                          | <b>1.33 (1.04, 1.71)</b>                                                           |
| Some college                     |                                               | <b>1.63 (1.27, 2.09)</b>                      | <b>1.60 (1.25, 2.05)</b>                                                | <b>1.60 (1.25, 2.05)</b>                              | <b>1.61 (1.26, 2.07)</b>                                              | <b>1.57 (1.23, 2.02)</b>                          | <b>1.60 (1.24, 2.05)</b>                                                           |
| College graduate or above        |                                               | <b>2.57 (2.00, 3.29)</b>                      | <b>2.50 (1.95, 3.20)</b>                                                | <b>2.50 (1.95, 3.20)</b>                              | <b>2.53 (1.97, 3.25)</b>                                              | <b>2.45 (1.91, 3.15)</b>                          | <b>2.49 (1.94, 3.21)</b>                                                           |
| Household Income                 |                                               |                                               |                                                                         |                                                       |                                                                       |                                                   |                                                                                    |
| < \$20k                          |                                               | Ref.                                          | Ref.                                                                    | Ref.                                                  | Ref.                                                                  | Ref.                                              | Ref.                                                                               |
| \$20k - \$34k                    |                                               | 1.19 (0.97, 1.46)                             | 1.17 (0.95, 1.43)                                                       | 1.17 (0.95, 1.43)                                     | 1.17 (0.95, 1.44)                                                     | 1.15 (0.93, 1.41)                                 | 1.16 (0.94, 1.42)                                                                  |
| \$35k - \$74k                    |                                               | 1.23 (1.00, 1.51)                             | 1.18 (0.95, 1.45)                                                       | 1.18 (0.95, 1.45)                                     | 1.19 (0.96, 1.46)                                                     | 1.15 (0.93, 1.41)                                 | 1.15 (0.93, 1.42)                                                                  |
| ≥ \$75k                          |                                               | <b>1.88 (1.49, 2.37)</b>                      | <b>1.78 (1.41, 2.24)</b>                                                | <b>1.77 (1.40, 2.24)</b>                              | <b>1.80 (1.42, 2.27)</b>                                              | <b>1.71 (1.35, 2.17)</b>                          | <b>1.72 (1.36, 2.17)</b>                                                           |
| Refused                          |                                               | <b>1.44 (1.15, 1.81)</b>                      | <b>1.39 (1.11, 1.75)</b>                                                | <b>1.39 (1.11, 1.75)</b>                              | <b>1.41 (1.12, 1.78)</b>                                              | <b>1.37 (1.09, 1.73)</b>                          | <b>1.38 (1.10, 1.74)</b>                                                           |
| Marital Status                   |                                               |                                               |                                                                         |                                                       |                                                                       |                                                   |                                                                                    |
| Single                           |                                               | Ref.                                          | Ref.                                                                    | Ref.                                                  | Ref.                                                                  | Ref.                                              | Ref.                                                                               |
| Married                          |                                               | <b>1.47 (1.14, 1.91)</b>                      | <b>1.44 (1.11, 1.87)</b>                                                | <b>1.44 (1.11, 1.87)</b>                              | <b>1.41 (1.09, 1.83)</b>                                              | <b>1.42 (1.09, 1.84)</b>                          | <b>1.42 (1.09, 1.84)</b>                                                           |
| Divorced                         |                                               | <b>1.46 (1.10, 1.93)</b>                      | <b>1.42 (1.07, 1.89)</b>                                                | <b>1.42 (1.07, 1.89)</b>                              | <b>1.43 (1.08, 1.90)</b>                                              | <b>1.43 (1.08, 1.89)</b>                          | <b>1.44 (1.08, 1.90)</b>                                                           |
| Widowed                          |                                               | 1.17 (0.89, 1.55)                             | 1.14 (0.87, 1.51)                                                       | 1.14 (0.87, 1.51)                                     | 1.13 (0.86, 1.49)                                                     | 1.13 (0.86, 1.50)                                 | 1.13 (0.86, 0.49)                                                                  |
| Other                            |                                               | 1.19 (0.71, 2.01)                             | 1.17 (0.69, 1.96)                                                       | 1.17 (0.69, 1.97)                                     | 1.16 (0.69, 1.96)                                                     | 1.21 (0.72, 2.03)                                 | 1.21 (0.72, 2.03)                                                                  |
| <i>Neighborhood Stressors</i>    |                                               |                                               |                                                                         |                                                       |                                                                       |                                                   |                                                                                    |

|                                       |  |  |                          |                          |                          |                          |                          |
|---------------------------------------|--|--|--------------------------|--------------------------|--------------------------|--------------------------|--------------------------|
| Neighborhood physical characteristics |  |  | <b>0.97 (0.95, 0.99)</b> | <b>0.97 (0.95, 0.99)</b> | <b>0.97 (0.95, 0.99)</b> | <b>0.97 (0.96, 0.99)</b> | <b>0.98 (0.96, 0.99)</b> |
| Neighborhood safety                   |  |  |                          |                          |                          |                          |                          |
| Unsafe                                |  |  |                          | Ref.                     | Ref.                     | Ref.                     | Ref.                     |
| Safe                                  |  |  |                          | 1.00 (0.87, 1.14)        | 0.97 (0.85, 1.11)        | 0.96 (0.84, 1.10)        | 0.95 (0.84, 1.09)        |
| Very safe                             |  |  |                          | 1.01 (0.87, 1.17)        | 0.97 (0.83, 1.13)        | 0.95 (0.81, 1.10)        | 0.94 (0.81, 1.10)        |
| Neighborhood social cohesion          |  |  |                          |                          | <b>1.05 (1.03, 1.08)</b> | <b>1.06 (1.03, 1.09)</b> | <b>1.05 (1.03, 1.08)</b> |
| <i>Individual Stressors</i>           |  |  |                          |                          |                          |                          |                          |
| Perceived Stress                      |  |  |                          |                          |                          | <b>0.96 (0.94, 0.98)</b> | <b>0.96 (0.94, 0.98)</b> |
| Discrimination                        |  |  |                          |                          |                          |                          | 0.89 (0.79, 1.01)        |

**eTable 3. Association Among Race, Individual and Community Stressors, and Ideal Cardiovascular Health for Men**

|                                       | <i>Model 1<br/>Race only<br/>(unadjusted)</i> | <i>Model 2<br/>Model 1 +<br/>demographics</i> | <i>Model 3<br/>Model 2 +<br/>physical<br/>community<br/>environment</i> | <i>Model 4<br/>Model 3 +<br/>community<br/>safety</i> | <i>Model 5<br/>Model 4 +<br/>community<br/>social<br/>environment</i> | <i>Model 6<br/>Model 5 +<br/>perceived stress</i> | <i>Model 7<br/>Model 6 +<br/>perceived<br/>discrimination<br/>(Fully adjusted)</i> |
|---------------------------------------|-----------------------------------------------|-----------------------------------------------|-------------------------------------------------------------------------|-------------------------------------------------------|-----------------------------------------------------------------------|---------------------------------------------------|------------------------------------------------------------------------------------|
|                                       | <b>OR<br/>95% CI</b>                          | <b>OR<br/>95% CI</b>                          | <b>OR<br/>95% CI</b>                                                    | <b>OR<br/>95% CI</b>                                  | <b>OR<br/>95% CI</b>                                                  | <b>OR<br/>95% CI</b>                              | <b>OR<br/>95% CI</b>                                                               |
| <b>Black versus White (ref).</b>      | <b>0.55 (0.44, 0.67)</b>                      | <b>0.71 (0.57, 0.88)</b>                      | <b>0.72 (0.58, 0.90)</b>                                                | <b>0.73 (0.58, 0.91)</b>                              | <b>0.73 (0.59, 0.91)</b>                                              | <b>0.73 (0.59, 0.91)</b>                          | <b>0.73 (0.57, 0.93)</b>                                                           |
| <i>Demographics</i>                   |                                               |                                               |                                                                         |                                                       |                                                                       |                                                   |                                                                                    |
| Age (years)                           |                                               | 1.01 (1.00, 1.02)                             | 1.01 (1.00, 1.02)                                                       | 1.01 (1.00, 1.02)                                     | 1.01 (1.00, 1.02)                                                     | 1.01 (1.00, 1.02)                                 | 1.01 (1.00, 1.02)                                                                  |
| Education                             |                                               |                                               |                                                                         |                                                       |                                                                       |                                                   |                                                                                    |
| Less than high school                 |                                               | Ref.                                          | Ref.                                                                    | Ref.                                                  | Ref.                                                                  | Ref.                                              | Ref.                                                                               |
| High school graduate                  |                                               | 1.32 (0.86, 2.02)                             | 1.30 (0.85, 2.00)                                                       | 1.30 (0.85, 1.99)                                     | 1.29 (0.84, 1.97)                                                     | 1.28 (0.84, 1.97)                                 | 1.28 (0.84, 1.97)                                                                  |
| Some college                          |                                               | <b>1.87 (1.22, 2.86)</b>                      | <b>1.83 (1.20, 2.80)</b>                                                | <b>1.82 (1.19, 2.79)</b>                              | <b>1.82 (1.19, 2.79)</b>                                              | <b>1.81 (1.18, 2.77)</b>                          | <b>1.81 (1.18, 2.77)</b>                                                           |
| College graduate or above             |                                               | <b>3.00 (1.98, 4.55)</b>                      | <b>2.92 (1.93, 4.44)</b>                                                | <b>2.90 (1.91, 4.41)</b>                              | <b>2.92 (1.92, 4.44)</b>                                              | <b>2.89 (1.90, 4.38)</b>                          | <b>2.88 (1.90, 4.38)</b>                                                           |
| Household Income                      |                                               |                                               |                                                                         |                                                       |                                                                       |                                                   |                                                                                    |
| < \$20k                               |                                               | Ref.                                          | Ref.                                                                    | Ref.                                                  | Ref.                                                                  | Ref.                                              | Ref.                                                                               |
| \$20k - \$34k                         |                                               | 1.00 (0.67, 1.49)                             | 0.97 (0.65, 1.45)                                                       | 0.97 (0.65, 1.45)                                     | 0.98 (0.65, 1.46)                                                     | 0.96 (0.64, 1.43)                                 | 0.96 (0.64, 1.43)                                                                  |
| \$35k - \$74k                         |                                               | 0.97 (0.65, 1.43)                             | 0.93 (0.63, 1.37)                                                       | 0.93 (0.63, 1.37)                                     | 0.93 (0.63, 1.38)                                                     | 0.91 (0.61, 1.34)                                 | 0.90 (0.61, 1.34)                                                                  |
| ≥ \$75k                               |                                               | 1.25 (0.83, 1.88)                             | 1.18 (0.78, 1.78)                                                       | 1.17 (0.78, 1.77)                                     | 1.18 (0.78, 1.78)                                                     | 1.14 (0.75, 1.72)                                 | 1.14 (0.75, 1.72)                                                                  |
| Refused                               |                                               | 1.16 (0.75, 1.79)                             | 1.10 (0.78, 1.78)                                                       | 1.10 (0.71, 1.71)                                     | 1.11 (0.72, 1.73)                                                     | 1.08 (0.70, 1.68)                                 | 1.08 (0.70, 1.68)                                                                  |
| Marital Status                        |                                               |                                               |                                                                         |                                                       |                                                                       |                                                   |                                                                                    |
| Single                                |                                               | Ref.                                          | Ref.                                                                    | Ref.                                                  | Ref.                                                                  | Ref.                                              | Ref.                                                                               |
| Married                               |                                               | 1.17 (0.75, 1.84)                             | 1.12 (0.71, 1.76)                                                       | 1.20 (0.71, 1.76)                                     | 1.10 (0.70, 1.72)                                                     | 1.08 (0.69, 1.70)                                 | 1.08 (0.69, 1.70)                                                                  |
| Divorced                              |                                               | 0.88 (0.52, 1.49)                             | 0.85 (0.50, 1.44)                                                       | 0.85 (0.50, 1.44)                                     | 0.84 (0.50, 1.43)                                                     | 0.83 (0.49, 1.41)                                 | 0.83 (0.49, 1.41)                                                                  |
| Widowed                               |                                               | 0.97 (0.58, 1.62)                             | 0.93 (0.55, 1.55)                                                       | 0.92 (0.55, 1.54)                                     | 0.91 (0.55, 1.53)                                                     | 0.90 (0.54, 1.51)                                 | 0.90 (0.54, 1.51)                                                                  |
| Other                                 |                                               | 0.82 (0.34, 2.02)                             | 0.79 (0.32, 1.94)                                                       | 0.79 (0.32, 1.94)                                     | 0.76 (0.31, 1.89)                                                     | 0.77 (0.31, 1.90)                                 | 0.77 (0.31, 1.89)                                                                  |
| <i>Neighborhood Stressors</i>         |                                               |                                               |                                                                         |                                                       |                                                                       |                                                   |                                                                                    |
| Neighborhood physical characteristics |                                               |                                               | <b>0.97 (0.94, 0.99)</b>                                                | 0.97 (0.94, 1.00)                                     | 0.97 (0.94, 1.00)                                                     | 0.97 (0.94, 1.00)                                 | 0.97 (0.94, 1.00)                                                                  |
| Neighborhood safety<br>Unsafe         |                                               |                                               |                                                                         | Ref.                                                  | Ref.                                                                  | Ref.                                              | Ref.                                                                               |

|                              |  |  |  |                   |                   |                   |                   |
|------------------------------|--|--|--|-------------------|-------------------|-------------------|-------------------|
| Safe                         |  |  |  | 1.05 (0.85, 1.30) | 1.03 (0.84, 1.28) | 1.02 (0.83, 1.27) | 1.03 (0.83, 1.27) |
| Very safe                    |  |  |  | 1.07 (0.84, 1.35) | 1.04 (0.82, 1.32) | 1.02 (0.81, 1.30) | 1.02 (0.81, 1.30) |
| Neighborhood social cohesion |  |  |  |                   | 1.04 (1.00, 1.09) | 1.04 (1.00, 1.09) | 1.04 (1.00, 1.09) |
| <i>Individual Stressors</i>  |  |  |  |                   |                   |                   |                   |
| Perceived Stress             |  |  |  |                   |                   | 0.98 (0.94, 1.01) | 0.97 (0.94, 1.01) |
| Discrimination               |  |  |  |                   |                   |                   | 1.01 (0.83, 1.23) |

**eTable 4. Association Among Race, Individual and Community Stressors, and Ideal Cardiovascular Health for Women**

|                                       | <i>Model 1<br/>Race only<br/>(unadjusted)</i> | <i>Model 2<br/>Model 1 +<br/>demographics</i> | <i>Model 3<br/>Model 2 +<br/>physical<br/>community<br/>environment</i> | <i>Model 4<br/>Model 3 +<br/>community<br/>safety</i> | <i>Model 5<br/>Model 4 +<br/>community<br/>social<br/>environment</i> | <i>Model 6<br/>Model 5 +<br/>perceived stress</i> | <i>Model 7<br/>Model 6 +<br/>perceived<br/>discrimination<br/>(Fully adjusted)</i> |
|---------------------------------------|-----------------------------------------------|-----------------------------------------------|-------------------------------------------------------------------------|-------------------------------------------------------|-----------------------------------------------------------------------|---------------------------------------------------|------------------------------------------------------------------------------------|
|                                       | <b>OR<br/>95% CI</b>                          | <b>OR<br/>95% CI</b>                          | <b>OR<br/>95% CI</b>                                                    | <b>OR<br/>95% CI</b>                                  | <b>OR<br/>95% CI</b>                                                  | <b>OR<br/>95% CI</b>                              | <b>OR<br/>95% CI</b>                                                               |
| <b>Black versus White (ref).</b>      | <b>0.34 (0.29, 0.40)</b>                      | <b>0.40 (0.34, 0.47)</b>                      | <b>0.42 (0.35, 0.49)</b>                                                | <b>0.41 (0.35, 0.49)</b>                              | <b>0.41 (0.34, 0.48)</b>                                              | <b>0.40 (0.34, 0.48)</b>                          | <b>0.45 (0.37, 0.54)</b>                                                           |
| <i>Demographics</i>                   |                                               |                                               |                                                                         |                                                       |                                                                       |                                                   |                                                                                    |
| Age (years)                           |                                               | 1.01 (1.00, 1.02)                             | 1.01 (1.00, 1.01)                                                       | 1.01 (1.00, 1.01)                                     | 1.01 (1.00, 1.01)                                                     | 1.01 (1.00, 1.01)                                 | 1.00 (0.99, 1.01)                                                                  |
| Education                             |                                               |                                               |                                                                         |                                                       |                                                                       |                                                   |                                                                                    |
| Less than high school                 |                                               | Ref.                                          | Ref.                                                                    | Ref.                                                  | Ref.                                                                  | Ref.                                              | Ref.                                                                               |
| High school graduate                  |                                               | <b>1.39 (1.02, 1.89)</b>                      | 1.36 (1.00, 1.86)                                                       | 1.37 (1.00, 1.86)                                     | <b>1.38 (1.01, 1.87)</b>                                              | 1.33 (0.97, 1.81)                                 | 1.35 (0.99, 1.84)                                                                  |
| Some college                          |                                               | <b>1.50 (1.10, 2.04)</b>                      | <b>1.47 (1.08, 2.00)</b>                                                | <b>1.48 (1.08, 2.01)</b>                              | <b>1.50 (1.10, 2.04)</b>                                              | <b>1.43 (1.05, 1.95)</b>                          | <b>1.49 (1.09, 2.03)</b>                                                           |
| College graduate or above             |                                               | <b>2.35 (1.72, 3.21)</b>                      | <b>2.29 (1.67, 3.13)</b>                                                | <b>2.29 (1.68, 3.14)</b>                              | <b>2.34 (1.71, 3.20)</b>                                              | <b>2.22 (1.62, 3.04)</b>                          | <b>2.32 (1.69, 3.18)</b>                                                           |
| Household Income                      |                                               |                                               |                                                                         |                                                       |                                                                       |                                                   |                                                                                    |
| < \$20k                               |                                               | Ref.                                          | Ref.                                                                    | Ref.                                                  | Ref.                                                                  | Ref.                                              | Ref.                                                                               |
| \$20k - \$34k                         |                                               | 1.24 (0.97, 1.58)                             | 1.22 (0.96, 1.56)                                                       | 1.22 (0.96, 1.56)                                     | 1.23 (0.97, 1.57)                                                     | 1.21 (0.95, 1.55)                                 | 1.22 (0.96, 1.56)                                                                  |
| \$35k - \$74k                         |                                               | <b>1.33 (1.04, 1.71)</b>                      | 1.28 (1.00, 1.65)                                                       | 1.28 (1.00, 1.65)                                     | <b>1.31 (1.01, 1.68)</b>                                              | 1.25 (0.97, 1.61)                                 | 1.26 (0.98, 1.62)                                                                  |
| ≥ \$75k                               |                                               | <b>2.55 (1.90, 3.42)</b>                      | <b>2.41 (1.79, 3.25)</b>                                                | <b>2.42 (1.80, 3.27)</b>                              | <b>2.49 (1.84, 3.35)</b>                                              | <b>2.34 (1.73, 3.16)</b>                          | <b>2.35 (1.74, 3.17)</b>                                                           |
| Refused                               |                                               | <b>1.55 (1.18, 2.03)</b>                      | <b>1.51 (1.15, 1.98)</b>                                                | <b>1.51 (1.15, 1.98)</b>                              | <b>1.54 (1.17, 2.02)</b>                                              | <b>1.49 (1.14, 1.96)</b>                          | <b>1.51 (1.15, 1.98)</b>                                                           |
| Marital Status                        |                                               |                                               |                                                                         |                                                       |                                                                       |                                                   |                                                                                    |
| Single                                |                                               | Ref.                                          | Ref.                                                                    | Ref.                                                  | Ref.                                                                  | Ref.                                              | Ref.                                                                               |
| Married                               |                                               | <b>1.57 (1.14, 2.16)</b>                      | <b>1.55 (1.12, 2.13)</b>                                                | <b>1.55 (1.13, 2.14)</b>                              | <b>1.52 (1.10, 2.09)</b>                                              | <b>1.57 (1.14, 2.16)</b>                          | <b>1.56 (1.13, 2.16)</b>                                                           |
| Divorced                              |                                               | <b>1.75 (1.25, 2.44)</b>                      | <b>1.72 (1.23, 2.41)</b>                                                | <b>1.72 (1.23, 2.40)</b>                              | <b>1.74 (1.24, 2.43)</b>                                              | <b>1.76 (1.26, 2.46)</b>                          | <b>1.78 (1.27, 2.49)</b>                                                           |
| Widowed                               |                                               | 1.30 (0.93, 1.80)                             | 1.28 (0.92, 1.77)                                                       | 1.28 (0.92, 1.78)                                     | 1.26 (0.91, 1.76)                                                     | 1.28 (0.92, 1.79)                                 | 1.28 (0.92, 1.77)                                                                  |
| Other                                 |                                               | 1.43 (0.76, 2.72)                             | 1.42 (0.75, 2.69)                                                       | 1.42 (0.75, 2.69)                                     | 1.45 (0.76, 2.74)                                                     | 1.54 (0.81, 2.92)                                 | 1.53 (0.81, 2.90)                                                                  |
| <i>Neighborhood Stressors</i>         |                                               |                                               |                                                                         |                                                       |                                                                       |                                                   |                                                                                    |
| Neighborhood physical characteristics |                                               |                                               | <b>0.97 (0.95, 0.99)</b>                                                | <b>0.97 (0.95, 0.99)</b>                              | 0.97 (0.95, 1.00)                                                     | 0.98 (0.95, 1.00)                                 | 0.98 (0.96, 1.00)                                                                  |
| Neighborhood safety                   |                                               |                                               |                                                                         |                                                       |                                                                       |                                                   |                                                                                    |
| Unsafe                                |                                               |                                               |                                                                         | Ref.                                                  | Ref.                                                                  | Ref.                                              | Ref.                                                                               |

|                              |  |  |  |                   |                          |                          |                          |
|------------------------------|--|--|--|-------------------|--------------------------|--------------------------|--------------------------|
| Safe                         |  |  |  | 0.96 (0.81, 1.14) | 0.93 (0.78, 1.11)        | 0.91 (0.77, 1.08)        | 0.90 (0.76, 1.07)        |
| Very safe                    |  |  |  | 0.96 (0.79, 1.17) | 0.91 (0.75, 1.12)        | 0.88 (0.72, 1.08)        | 0.88 (0.72, 1.07)        |
| Neighborhood social cohesion |  |  |  |                   | <b>1.07 (1.03, 1.11)</b> | <b>1.07 (1.03, 1.11)</b> | <b>1.07 (1.03, 1.11)</b> |
| <i>Individual Stressors</i>  |  |  |  |                   |                          |                          |                          |
| Perceived Stress             |  |  |  |                   |                          | <b>0.95 (0.92, 0.97)</b> | <b>0.95 (0.92, 0.97)</b> |
| Discrimination               |  |  |  |                   |                          |                          | <b>0.80 (0.68, 0.95)</b> |
