# Supplementary material for: Neighborhood Factors, Individual Stressors, and Cardiovascular Health Among Black and White Adults in the US: The Reasons for Geographic and Racial Differences in Stroke (REGARDS) Study
Source: PubMed Central journal article supplement (PMC10543067; doi:10.1001/jamanetworkopen.2023.36207), 2023-09-29
Supplement: jamanetwopen-e2336207-s002.pdf [file jamanetwopen-e2336207-s002.pdf]

## Data Sharing Statement

Hines. Neighborhood Factors, Individual Stressors, and Cardiovascular Health Among Black and White Adults in the US. *JAMA Netw Open*. Published September 29, 2023.

doi:10.1001/jamanetworkopen.2023.36207

### Data

**Data available:** No

### Additional Information

**Explanation for why data not available:** Data are available through request to the REGARDS study.
